# Supplementary material
Source: PubMed Central journal article supplement (PMC10518997)
Supplement: NIHPP2023.03.11.532203V2-supplement-1.pdf [file NIHPP2023.03.11.532203V2-supplement-1.pdf]

898 **Supplemental Figures**

899

900

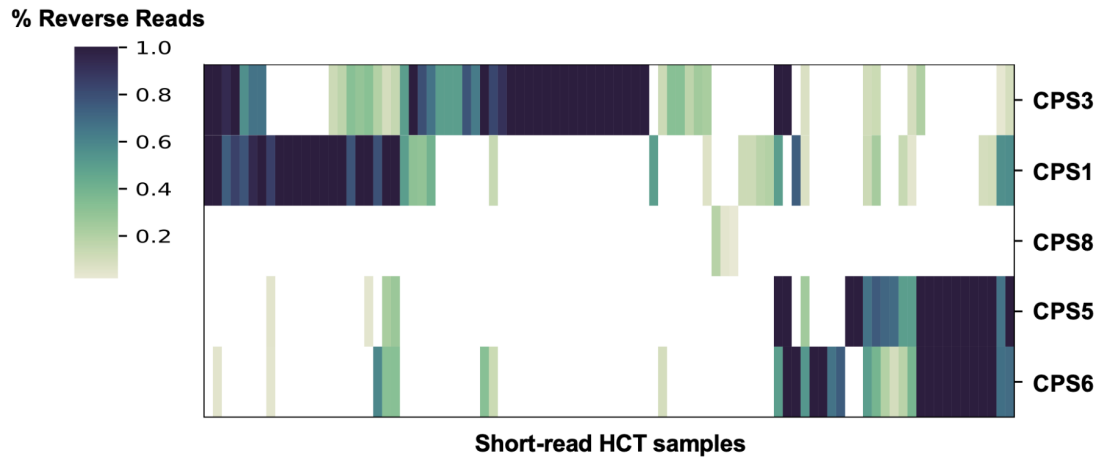

901

902 **Fig. S1. Inversion proportion of CPS loci invertons in BTh.** Inversion proportions of CPS loci  
903 invertons in HCT metagenomic samples measured with PhaseFinder. Samples with no inversions  
904 in the five CPS invertons were removed.

905

906

907

908

909

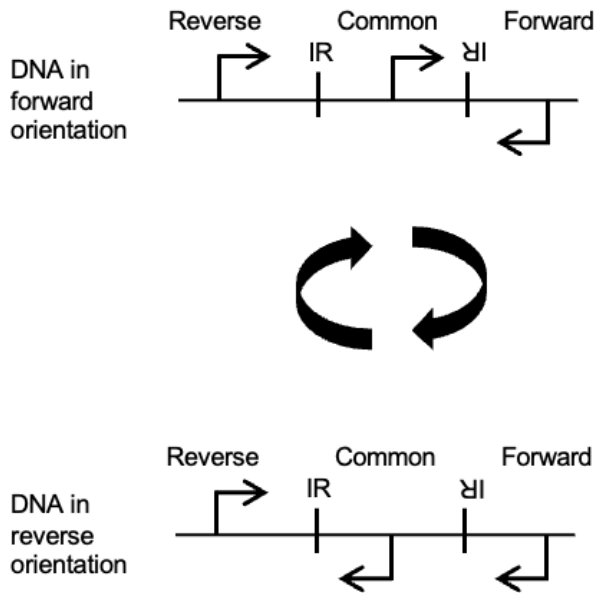

910

911 **Fig. S2. Invertion confirmation PCR primer design.** A Forward and Reverse primer bind to  
912 regions of the genome upstream and downstream of the invertion on opposite strands. The  
913 Common primer binds the DNA inside of the invertion, between the inverted repeats. When the  
914 DNA is in the forward orientation, the Common and Forward primer will generate a PCR  
915 product. When the invertion flips, the Common and Reverse primer will generate a PCR product.  
916

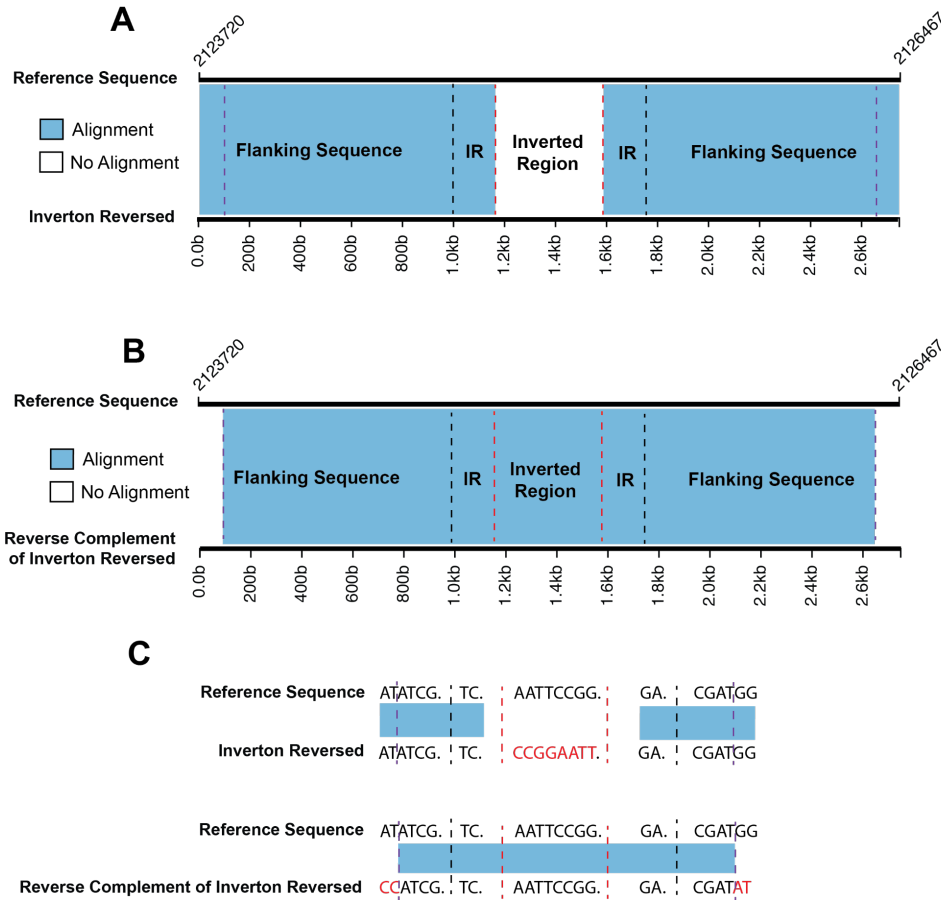

917  
918  
919  
920  
921  
922  
923  
924  
925  
926  
927  
928  
929  
930  
931  
932  
933  
934

**Fig. S3. Very long (>750bp), near perfect, inverted repeats can lead to false positives.** (A) Alignment of inverter NZ\_CP025371.1:2124719-2124870-2125316-2125467, with its invertible sequence inverted, against the *B. pertussis* genome leads to perfect alignment of flanking and IR regions as expected. ‘Reference genome’ refers to the *B. pertussis* reference genome sequence. ‘Invertion reversed’ refers to the putative inverter sequence and flanking sequence, with the invertible sequence inverted. Red dashed lines indicate boundaries of the invertible sequence, black dashed lines indicate boundaries of the inverted repeats as detected by einverted, and purple dashed lines indicate the true boundary of inverted repeats. (B) Alignment of the reverse complement of the entire inverter NZ\_CP025371.1:2124719-2124870-2125316-2125467 with its invertible sequence inverted and flanking sequence, against the *B. pertussis* genome leads to near perfect alignment (6 mismatches) spanning far into the flanking sequence to the true boundary of the inverted repeats, allowing for reads to map regardless of inverter orientation. (C) Example with toy nucleotide sequences. Red nucleotides indicate mismatches.

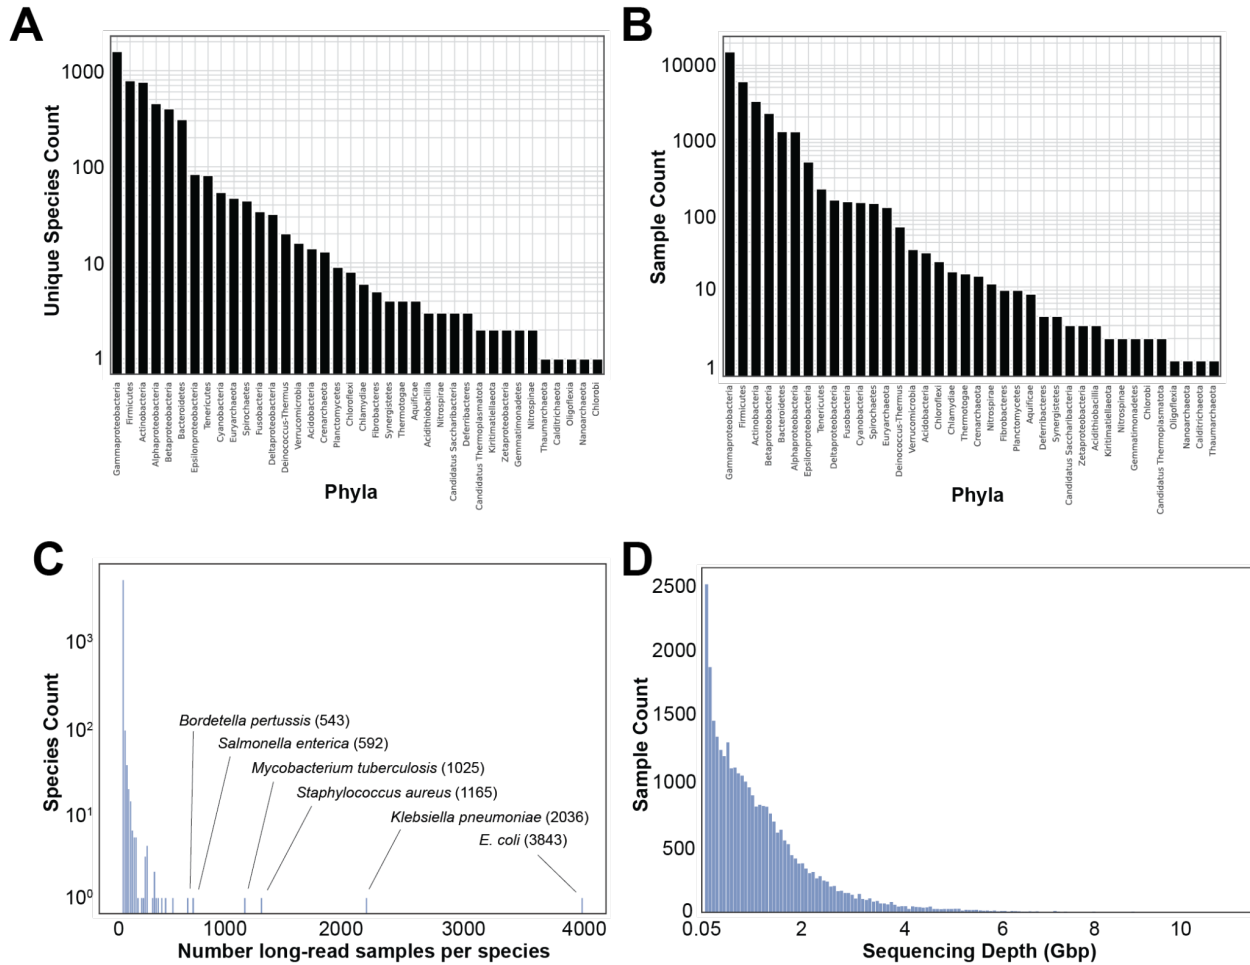

935

936 **Fig. S4. Overview of SRA long-read isolate sequencing samples analyzed with PhaVa. (A)**

937 The number of unique species represented in the dataset, grouped by phylum. **(B)** The raw

938 number of sequencing samples, grouped by phylum. **(C)** Histogram of sequencing samples per

939 species. Species with particularly large numbers of samples are labeled. **(D)** A histogram of

940 sequencing depths for all long-read isolate sequencing samples.

941

942

943

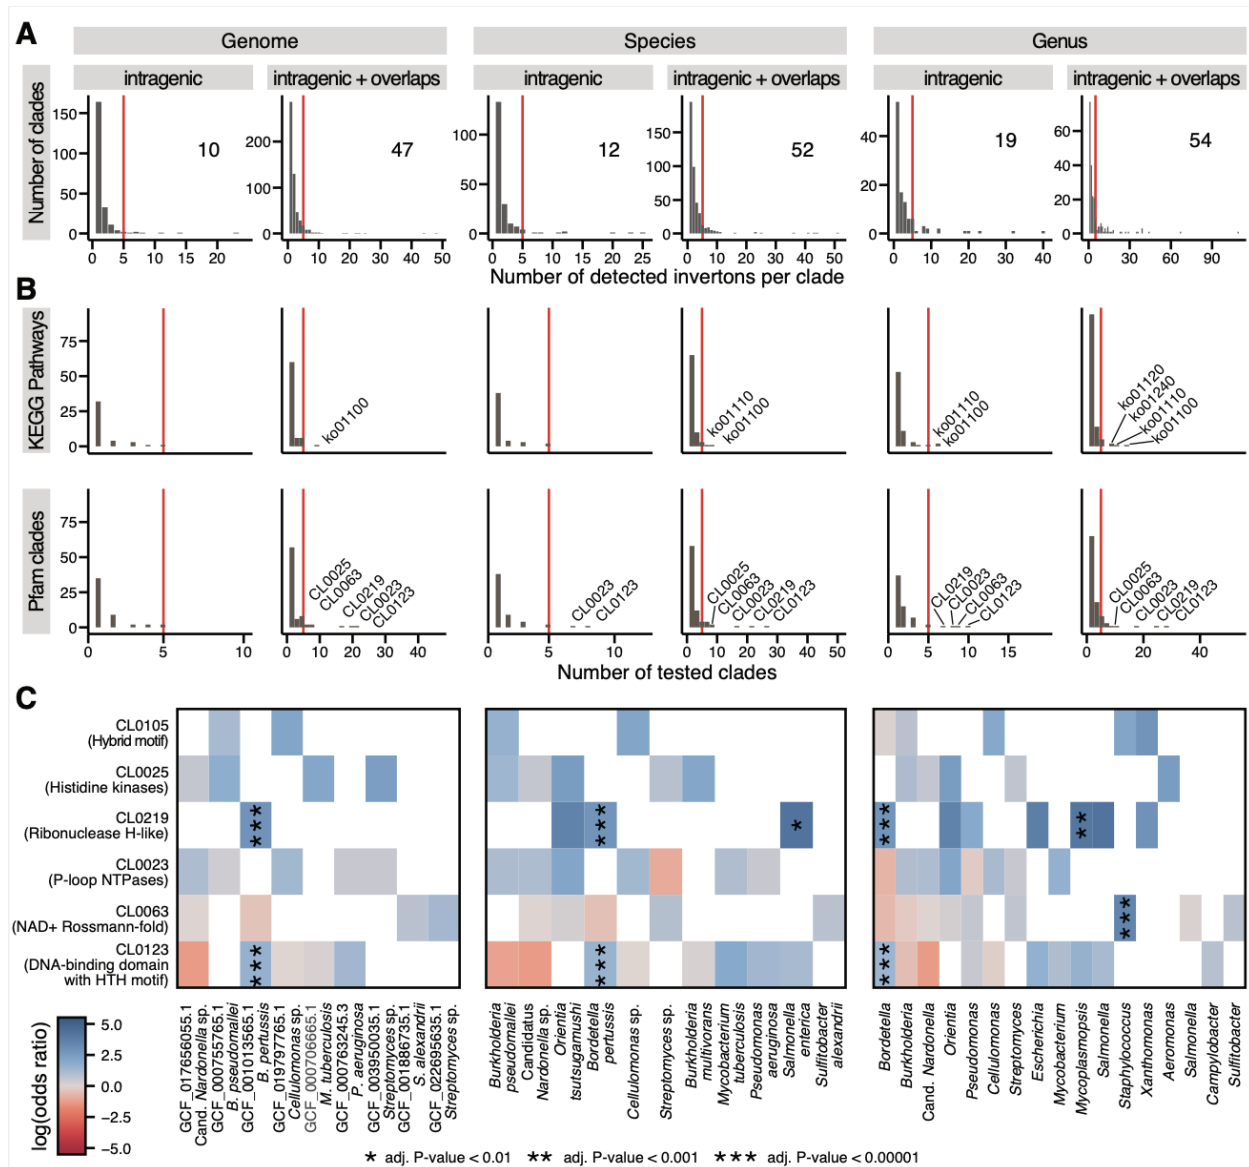

944

945 **Fig. S5. Intragenic invertons are rare across genomes yet consistently enriched in some**  
 946 **Pfam clans. (A)** Histograms showing the number of clades (genomes, species, or genera) at  
 947 various numbers of invertons indicate that invertons are rare, as only one to three  
 948 invertons can be detected in the majority of clades. Only clades with at least five  
 949 invertons (red line; number of clades is indicated in the top-right corner of each  
 950 subplot) were included for the subsequent enrichment analysis. **(B)** KEGG pathways  
 951 and Pfam clans were tested for enrichment of intragenic (or partial intergenic)  
 952 invertons in included clades, using a one-sided Fisher's exact test per clade (see  
 953 Methods). Enrichment was only calculated for sets with at least five invertons  
 954 associated with genes in the set. Histograms show the number of sets with enrichment  
 score at the number of included clades, showing that most enrichments could be  
 calculated for single

955 clades only. For example, all KEGG pathways associated with enough intragenic invertons for  
956 an enrichment analysis on genome-level were specific for each genome. Sets with enrichment  
957 scores across at least five clades (red line) are labeled with their corresponding identifiers. **(C)**  
958 Heatmap showing the log-odds ratio (effect size for the enrichment of intragenic invertons)  
959 across included clades for the six Pfam clans that have enrichment scores on genus-level (see  
960 panel B). Stars indicate significance of the enrichment as calculated by Fisher's exact test and  
961 corrected for multiple hypothesis testing using the Benjamini-Hochberg procedure.  
962

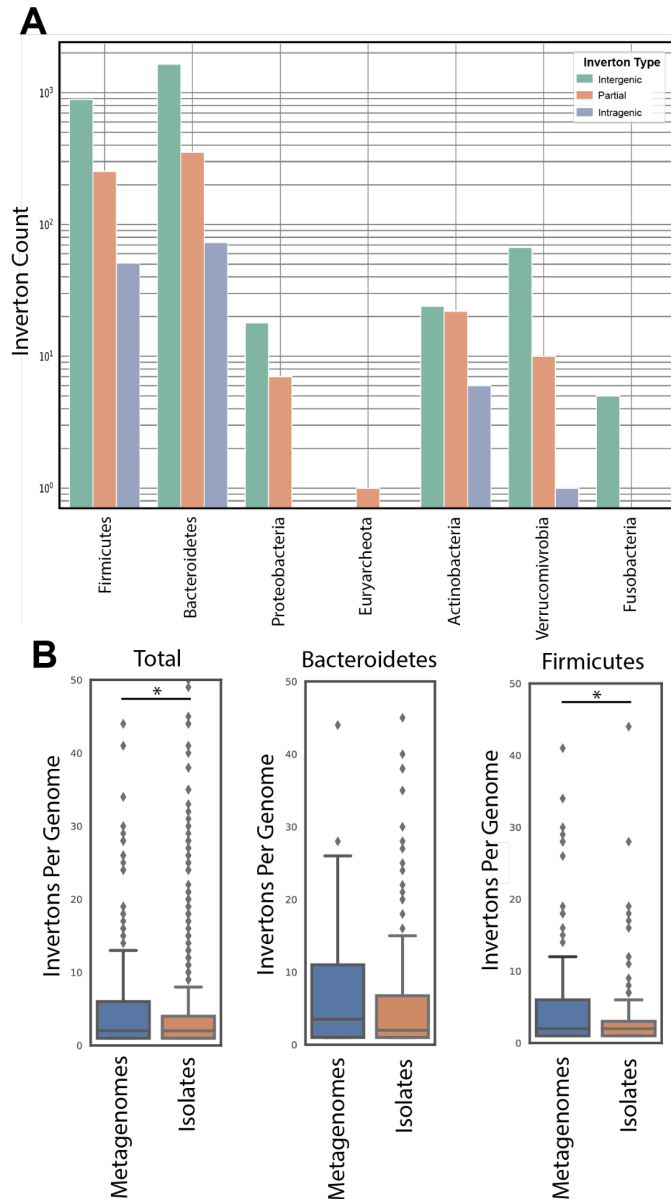

963

964 **Fig. S6. PhaVa analysis of 210 long-read metagenomes from human stool.** (A) Counts of  
965 invertions identified with PhaVa in 210 stool samples, grouped by phylum and the type of  
966 invertion. (B) Comparisons of the number of invertions (per genome) found in metagenomic  
967 datasets vs. SRA isolate sequencing samples. Total refers to all invertions identified, regardless of  
968 taxonomic classification. The distribution of invertion counts per species were found to be  
969 significantly different between metagenomes and isolate samples in both the Total and  
970 Firmicutes comparisons ( $p=3.35e-05$  and  $p=0.005$  respectively) with a Kolmogorov–Smirnov  
971 test. Other individual phyla were not compared due to small species counts with invertions in  
972 metagenomic samples.

973

**A**

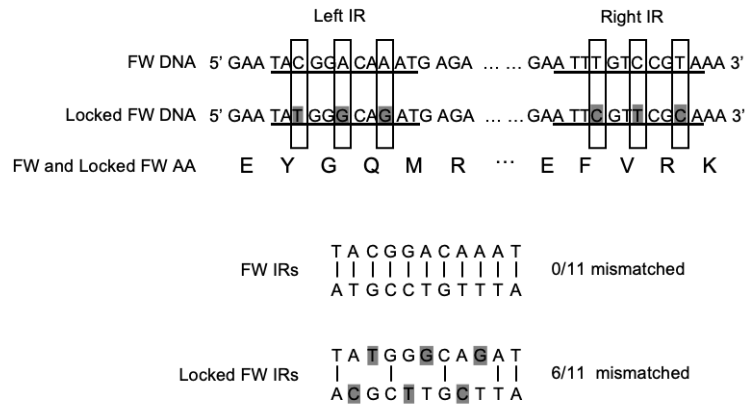

**B**

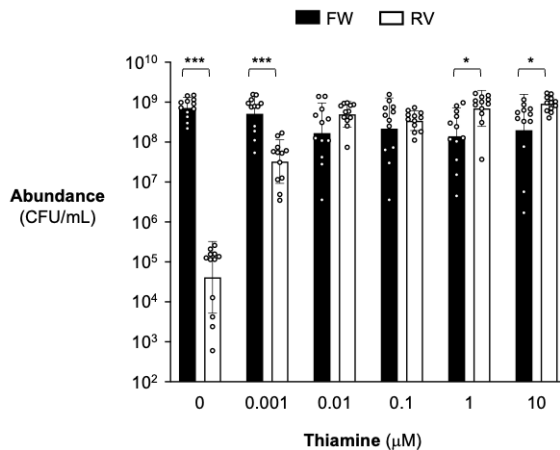

**C**

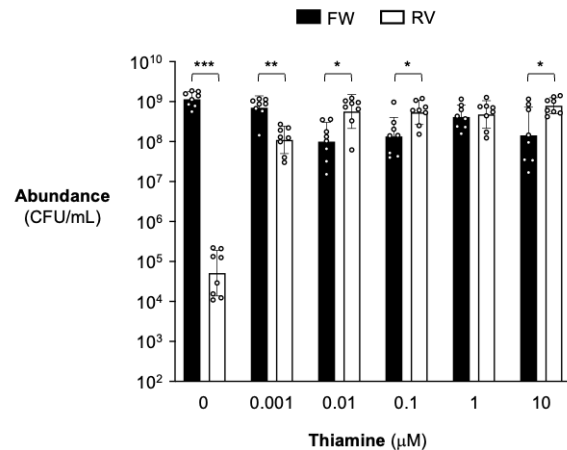

974

975 **Fig. S7. Locked *thiC* intragenic inverton construction and growth competition. (A)**  
976 Generation of locked intragenic invertons. The forward and locked forward *thiC* IR nucleotide  
977 sequences are shown. When possible, the wobble position of each codon corresponding to the IR  
978 was mutated to increase mismatches between the two palindromic sequences while maintaining  
979 the amino acid sequence. Nucleotides that were mutated are highlighted in gray. **(B-C)** Locked  
980 *thiC* strains were competed against each other in thiamine-containing media in a 1:1 ratio. After  
981 40 hours, the abundance of each strain was enumerated using selective agar. Black bars indicate  
982 the locked forward strain and white bars indicate the locked reverse strain. Recovered  
983 abundances shown here correspond with the competitive index shown in Fig. 4D. In **(B)** the  
984 locked forward strain is marked with an erythromycin resistant cassette and the locked reverse  
985 strain is marked with a tetracycline resistant cassette. In **(C)** the locked forward strain is marked  
986 with a tetracycline resistant cassette and the locked reverse strain is marked with an  
987 erythromycin resistant cassette. Geometric mean and geometric standard deviation are shown for  
988 replicates conducted across 4-6 independent experiments. For each thiamine concentration a ratio  
989 paired t test was performed on the locked forward and locked reverse abundances. \*\*\*,  $p <$   
990 0.001; \*\*,  $p <$  0.01; \*,  $p <$  0.05.

991



992

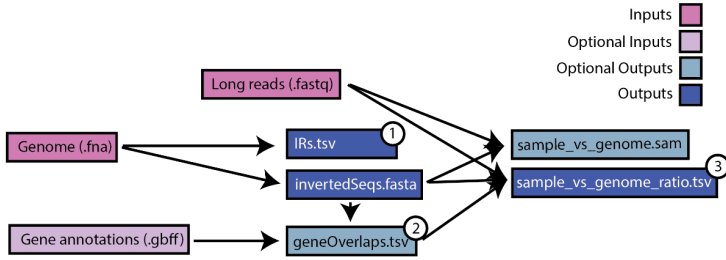

① IRs.tsv

| chromosome | left IR start | left IR stop | right IR start | right IR stop | left IR sequence | invertible sequence | right IR sequence |
|------------|---------------|--------------|----------------|---------------|------------------|---------------------|-------------------|
| chr1       | 1032          | 1046         | 1146           | 1160          | ATCG             | TACGGATATTACG       | CGAT              |

② geneOverlaps.tsv

| Invertion | gene overlaps   | Upstream Gene | Upstream Gene | Upstream Gene | Downstream Gene | Downstream Gene | Downstream Gene |
|-----------|-----------------|---------------|---------------|---------------|-----------------|-----------------|-----------------|
|           |                 | Strand        | Distance      |               | Strand          | Distance        |                 |
| inv1      | intragenic BT04 | BT03          | +             | 100           | BT05            | -               | 150             |

③ sample\_vs\_genome\_ratio.tsv

| Invertion | gene overlaps   | forward read # | reverse read # | reverse ratio | sample | Upstream Gene | Upstream Gene | Upstream Gene | Downstream Gene | Downstream Gene | Downstream Gene |
|-----------|-----------------|----------------|----------------|---------------|--------|---------------|---------------|---------------|-----------------|-----------------|-----------------|
|           |                 |                |                |               |        | Strand        | Distance      |               | Strand          | Distance        |                 |
| inv1      | intragenic BT04 | 15             | 5              | 0.25          | SRR123 | BT03          | +             | 100           | BT05            | -               | 150             |

993

994 **Figure S8: Inputs and outputs of a variation\_wf PhaVa run.** Output tables of particular  
 995 interest are labeled and shown below the diagram with example output.

| Strain name                                                                                                                                                      | Source        | Identifier                 |
|------------------------------------------------------------------------------------------------------------------------------------------------------------------|---------------|----------------------------|
| <i>Bacteroides thetaiotaomicron</i> VPI-5482 $\Delta tdk$                                                                                                        | <sup>79</sup> | WT                         |
| <i>Bacteroides thetaiotaomicron</i> VPI-5482 $\Delta tdk$ $\Delta BT0650$                                                                                        | this study    | RC131                      |
| <i>Bacteroides thetaiotaomicron</i> VPI-5482 $\Delta tdk$ BT0650 locked RV                                                                                       | this study    | RC149                      |
| <i>Bacteroides thetaiotaomicron</i> VPI-5482 $\Delta tdk$ BT0650 locked FW                                                                                       | this study    | RC134                      |
| <i>Bacteroides thetaiotaomicron</i> VPI-5482 $\Delta tdk$ BT0650 locked FW<br><i>NBU2::NBU2_tet</i>                                                              | this study    | RC165                      |
| <i>Bacteroides thetaiotaomicron</i> VPI-5482 $\Delta tdk$ BT0650 locked FW<br><i>NBU2::NBU2_erm</i>                                                              | this study    | RC 166                     |
| <i>Bacteroides thetaiotaomicron</i> VPI-5482 $\Delta tdk$ BT0650 locked RV<br><i>NBU2::NBU2_erm</i>                                                              | this study    | RC164                      |
| <i>Bacteroides thetaiotaomicron</i> VPI-5482 $\Delta tdk$ BT0650 locked RV<br><i>NBU2::NBU2_tet</i>                                                              | this study    | RC163                      |
| <i>E. coli</i> S17-1 $\lambda pir$ ; <i>zxx::RP4 2-(Tetr::Mu) (Kanr::Tn7) \lambda pir</i>                                                                        | <sup>80</sup> | S17-1 $\lambda pir$        |
| <i>E. coli</i> DH5 $\alpha$ $\lambda pir$ ; <i>F- endA1 hsdR17 (r-m+) supE44 thi-1 recA1 gyrA relA1 \Delta(lacZYA-argF)U189 \phi80lacZ\Delta M15 \lambda pir</i> | <sup>81</sup> | DH5 $\alpha$ $\lambda pir$ |

996  
997  
998

**Table S1. Strains used in this study**

| <b>Recombinant DNA</b>        | <b>Identifier</b> | <b>Source</b> |
|-------------------------------|-------------------|---------------|
| pKNOCK- <i>bla-ermGb::tdk</i> | pExchange         | 79            |
| pExchange BT0650 KO           | pRBC20            | this study    |
| pExchange BT0650 locked FW    | pRBC21            | this study    |
| pExchange BT0650 locked RV    | pRBC22            | this study    |
| pNBU2_tet                     | tetR              | 24            |
| pNBU2_erm                     | ermR              | 24            |

999  
1000  
1001

**Table S2. Recombinant DNA used in this study**
